# Supplementary material for: A Graphical Approach for Hybrid Simulation of 3D Diffusion Bio-Models via Coloured Hybrid Petri Nets
Source: Hindawi journal article supplement (doi:10.1155/2020/4715172), 2020-07-30
Supplement: f1 [file 4715172.f1.pdf]

## A Appendix

This appendix provides all the details of the constructed model (Fig. 3) in candle format, an exchange format used by Snoopy [11,41]. For more details, please contact, Snoopy HPN user manual [42].

```
colhpn  [Ca3dmodel]
{
constants:
  int D1 = 9;
  int D2 = 9;
  int MID = D1/2;
  int D3 = 9;
  int L = 2;
  int M = 2;
```

```
int K = 3;
int N = 2;
int p = 1;
int q = 2;
// parameters
double ks_p = 50;
double ks_m = 100;
double km_p = 6;
double km_m = 0.99;
double kd_p = 150;
double kd_m = 300;
double Di_bs = 0;
double Di_bm = 20;
double Di_bd = 15;
double Di_c = 223;
double a1 = 81.15;
double a2 = 1.845;
double a3 = 200;
double a4 = 1.15;
double a5 = 53.9;
double a0 = 540;
double b1 = 228;
double b2 = 0.409;
double b3 = 188.5;
double b4 = 0.095;
double b5 = 4.52;
double b0 = 80;
double P = 6320000;
double Rs = 0.5;
double C0 = 0.05;
double PL = 0.04;
double Pp = 400;
double Kd = 0.2;
double Pch = 6320;
double IP3 = 0.35 ;
double Di_E = 95;
double Bs = 400;
double Bm = 0;
double dx = 0.5;
double dy = 0.5;
double CX0 = 2;
double CY0 = 2;
double Cdy = 1;
double Cdx = 1;
double k1 = 28.09;
```

```

double k3 = 9.43;
double d5 = 1;
double dz = 0.5;
double CdZ = 1;
double CZ0 = 2;
// colorsets:
Dot = {dot};
xdim = {1..D1};
ydim = {1..D2};
row = {1..L};
column = {1..M};
crow = {1..K};
ccolumn = {1..N};
zdim = {1..D3};
c3dim = {1..q};
dim3 = {1..p};
Grid3D = PROD(xdim,ydim,zdim);
Channels = PROD(crow,ccolumn,c3dim);
Cl = PROD(row,column,dim3);
ChinCls = PROD(Cl,Channels);
//variables:
xdim : x;
ydim : y;
xdim : a;
ydim : b;
row : l;
column : m;
crow : k;
ccolumn : n;
zdim : z;
zdim : c;
dim3 : i;
c3dim : j;
// colorfunctions:
bool IsNeighbour(xdim x,ydim y,zdim z,xdim a,ydim b,zdim c)
{
    (a=x+1 & b=y+1 & c=z+1) |           //neighbouring conditions
    (a=x-1 & b=y-1 & c=z-1) |
    (a=x   & b=y+1 & c=z+1) |
    (a=x   & b=y+1 & c=z) |
    (a=x+1 & b=y   & c=z+1) |
    (a=x+1 & b=y   & c=z) |
    (a=x+1 & b=y+1 & c=z) |
    (a=x+1 & b=y   & c=z+1) |
    (a=x   & b=y-1 & c=z) |

```

```

    (a=x-1 & b=y    & c=z)|
    (a=x-1 & b=y    & c=z-1) &
    ((1<=a & a<=D1) &(1<=b& b<=D2) & (1<=c& c<=D2))//boundary conditions
}
//places marking:
//discrete places:
ChinCls XAct = 0'all;
ChinCls X10 = 0'all;
ChinCls X00 = 4'all;
ChinCls opChans = 0'all;
Cl opChCounter = 0'all;
ChinCls X01 = 0'all;
ChinCls X11 = 0'all;
//continuous places:
Grid3D CaE = 700'(MID,MID,MID);
Grid3D CaM = 0'all;
Grid3D CaS = 0'all;
Grid3D CaC = 0'all;
Cl clCaC = 0'all;
// transitions :
// Guard expression
//:transition function;
// stochastic:
// Ass
:
: [XAct + {(l,m,i),(k,n,j)}}] & [X10    {(l,m,i),(k,n,j)}}]
: MassAction(a0) ;
// Diss
:
: [X10 + {(l,m,i),(k,n,j)}}] & [XAct    {(l,m,i),(k,n,j)}}]
: MassAction(b0) ;
// bind_ac
: [clCaC {(l,m,i)}]
: [X10 + {(l,m,i),(k,n,j)}}] & [X00    {(l,m,i),(k,n,j)}}]
: MassAction((a5*(clCaC+C0))/(1+k1));
// unbind3_ac
:
: [X00 + {(l,m,i),(k,n,j)}}] & [X10    {(l,m,i),(k,n,j)}}]
: MassAction(b5);
// bind1_ac
: [clCaC {(l,m,i)}]
: [X11 + {(l,m,i),(k,n,j)}}] & [X01    {(l,m,i),(k,n,j)}}]
: MassAction((clCaC+C0)*a5/(1+k3));
// unbind1_ac
:

```

```

      : [X01 + {(l,m,i),(k,n,j)}] & [X11 {(l,m,i),(k,n,j)}]
      : MassAction(b5);
// unbind1_ic
:
: [X10 + {(l,m,i),(k,n,j)}] & [X11 {(l,m,i),(k,n,j)}]
: MassAction(b2);
// unbind_ic
:
: [X00 + {(l,m,i),(k,n,j)}] & [X01 {(l,m,i),(k,n,j)}]
: MassAction((b4*k3+b2)/(1+k3)) ;
// bind_ic
: [clCaC {(l,m,i)}]
: [X01 + {(l,m,i),(k,n,j)}] & [X00 {(l,m,i),(k,n,j)}]
: MassAction((clCaC+C0)*(a4*k1+a2)/(1+k1));
// bind1_ic
: [clCaC {(l,m,i)}]
: [X11 + {(l,m,i),(k,n,j)}] & [X10 {(l,m,i),(k,n,j)}]
: MassAction(a2*(clCaC+C0));
// continuous:
// Leak
: [CaC {(x,y,z)}]
: [CaC + {(x,y,z)}] & [CaE {(x,y,z)}]
: PL*(CaE CaC) ;
// DiffE
{[IsNeighbour(x,y,z,a,b,c)]}
:
: [CaE + {(a,b,c)}] & [CaE {(x,y,z)}]
: MassAction(Di_E) ;
// pump
:
: [CaE + {(x,y,z)}] & [CaC {(x,y,z)}]
: (Pp*CaC^2)/(Kd^2+CaC^2);
// Diffbm
{[IsNeighbour(x,y,z,a,b,c)]}
:
: [CaM + {(a,b,c)}] & [CaM {(x,y,z)}]
: MassAction(Di_2bm);
// kbm_m
:
: [CaC + {(x,y,z)}] & [CaM {(x,y,z)}]
: MassAction(km_m);
// kbm_p
: [CaM {(x,y,z)}]
: [CaM + {(x,y,z)}] & [CaC {(x,y,z)}]
: km_p*(Bm CaM)*CaC;

```

```

// Kbs_ m
:
: [CaC + {(x,y,z)}] & [CaS   {(x,y,z)}]
: MassAction(ks_ m );
// kbs_ p
: [CaS {(x,y,z)}]
: [CaS + {(x,y,z)}] & [CaC   {(x,y,z)}]
: ks_ p*(Bs CaS)*CaC;
// Diffc
{[IsNeighbour(x,y,z,a,b,c)]}
:
: [CaC + {(a,b,c)}] & [CaC   {(x,y,z)}]
: MassAction(Di_ c);
// Diffbs
{[IsNeighbour(x,y,z,a,b,c)]}
:
: [CaS + {(a,b,c)}] & [CaS   {(x,y,z)}]
: MassAction(Di_ bs) ;
// ER2CT
: [CaC {(x,y,z)}] & [opChCounter {(l,m,i)}]
: [CaC + {(x,y,z)}] & [CaE   {(x,y,z)}]
: 1t(sqrt( ([x]*dx (CX0+([l] 1)*Cdx))^2+([y]*dy (CY0+([m] 1)*Cdy))^2 +
([z]*dz (CZ0+([i] 1)*Cdz))^2 ),Rs*sqrt( opChCounter))*Pch*(CaE CaC);
// sum_ Cl_ Ca
: [CaC {(x,y,z)}]
: [clCaC + {(l,m,i)}]
: Rate(CaC ;
// immediate:
open
: [XAct >= {3'((l,m,i),(k,n,j))}] & [opChans < {(l,m,i),(k,n,j)}]
: [opChans + {(l,m,i),(k,n,j)}] & [opChCounter + {(l,m,i)}]
: 1 ;
// close
: [XAct < {3'((l,m,i),(k,n,j))}]
: [opChans   {(l,m,i),(k,n,j)}] & [opChCounter   {(l,m,i)}]
: 1 ;

```
